# Supplementary material for: Facile synthesis of ZnCo2O4 mesoporous structures with enhanced electrocatalytic oxygen evolution reaction properties
Source: Royal Society of Chemistry journal article supplement (doi:10.1039/c6ra14191a), 2016-01-01
Supplement: c6ra14191a1.pdf [file c6ra14191a1.pdf]

## Supporting Information

### Facile synthesis of $\text{ZnCo}_2\text{O}_4$ mesoporous structures with enhanced electrocatalytic oxygen evolution reaction properties

Jingchao Zhang, Daojun Zhang\*, Yujing Yang, Jingyu Ma, Shufang Cui, Yanmei Li,  
Baiqing Yuan\*

College of Chemistry and Chemical Engineering, Anyang Normal University,  
Anyang 455000, Henan, China

Henan Province Key Laboratory of New Optoelectronic Functional Materials.

\* Corresponding author. Tel.: +86 372 2900040.

E-mail: zhangdj0410@sohu.com , baiqingyuan1981@126.com

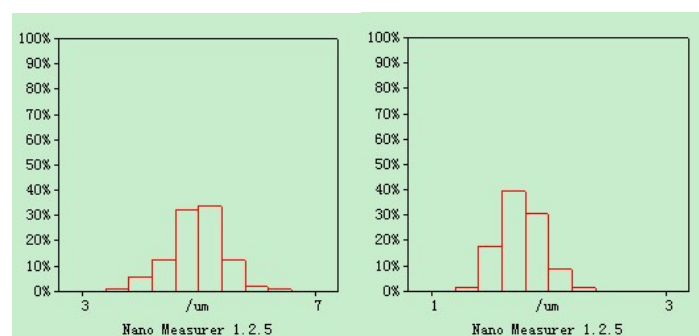

Fig.S1 The size distribution of the length (left) and diameter (right) of spindle-like  $\text{ZnCo}_2\text{O}_4$  precursors.

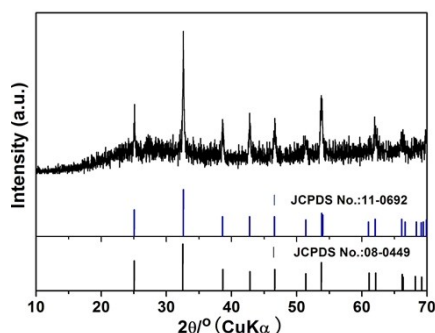

Fig.S2 The XRD pattern of spindle-like  $\text{ZnCo}_2\text{O}_4$  precursors obtained at 180 °C for 12 h.

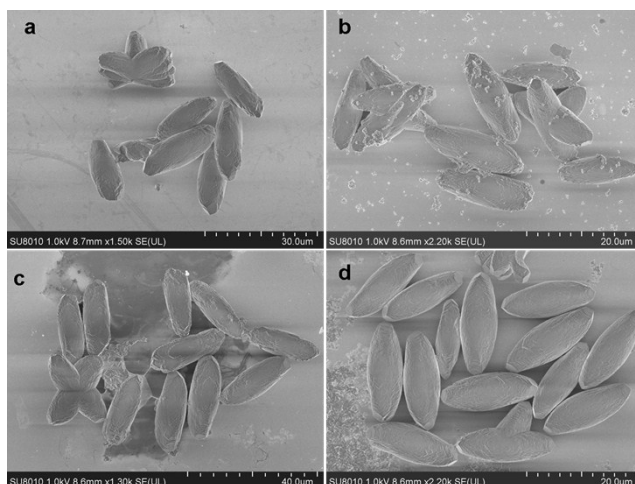

Fig.S3 SEM images of spindle-like  $\text{ZnCo}_2\text{O}_4$  precursors obtained at  $180\text{ }^\circ\text{C}$  for 12 h with different amount of PVP: (a) 0 mg, (b) 50 mg, (c) 100 mg, (d) 150 mg.

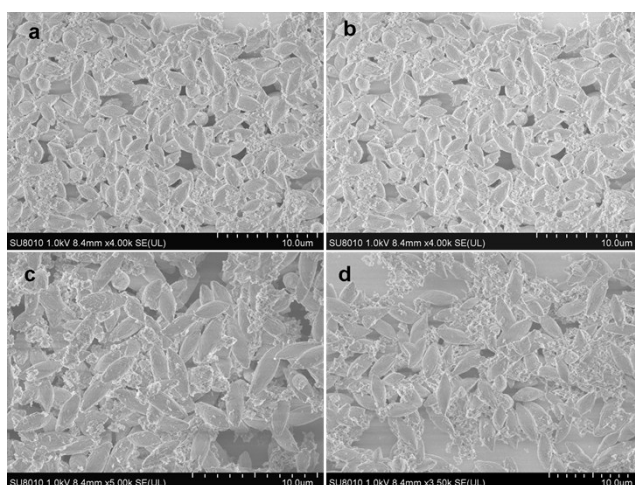

Fig.S4 SEM images of spindle-like  $\text{ZnCo}_2\text{O}_4$  precursors obtained at  $180\text{ }^\circ\text{C}$  for 12 h with different amount of hexylamine: (a)  $0\text{ }\mu\text{L}$ , (b)  $25\text{ }\mu\text{L}$ , (c)  $50\text{ }\mu\text{L}$ , (d)  $75\text{ }\mu\text{L}$ .

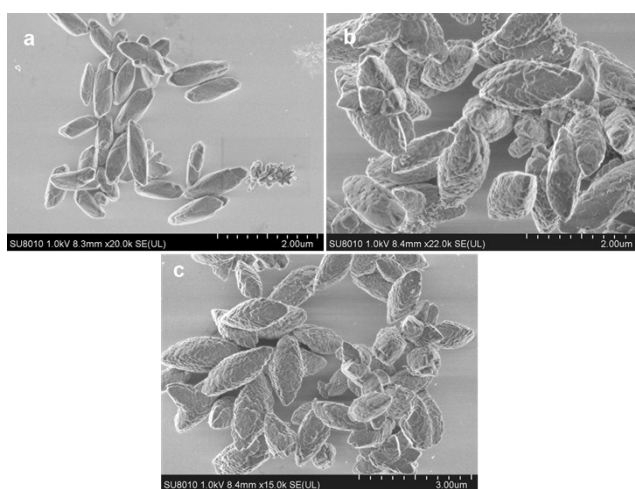

Fig.S5 SEM images of spindle-like  $\text{ZnCo}_2\text{O}_4$  precursors obtained at  $180\text{ }^\circ\text{C}$  for 12 h with different reactant concentrations: (a)  $1/4$ , (b)  $1/2$ , (c)  $3/4$ .

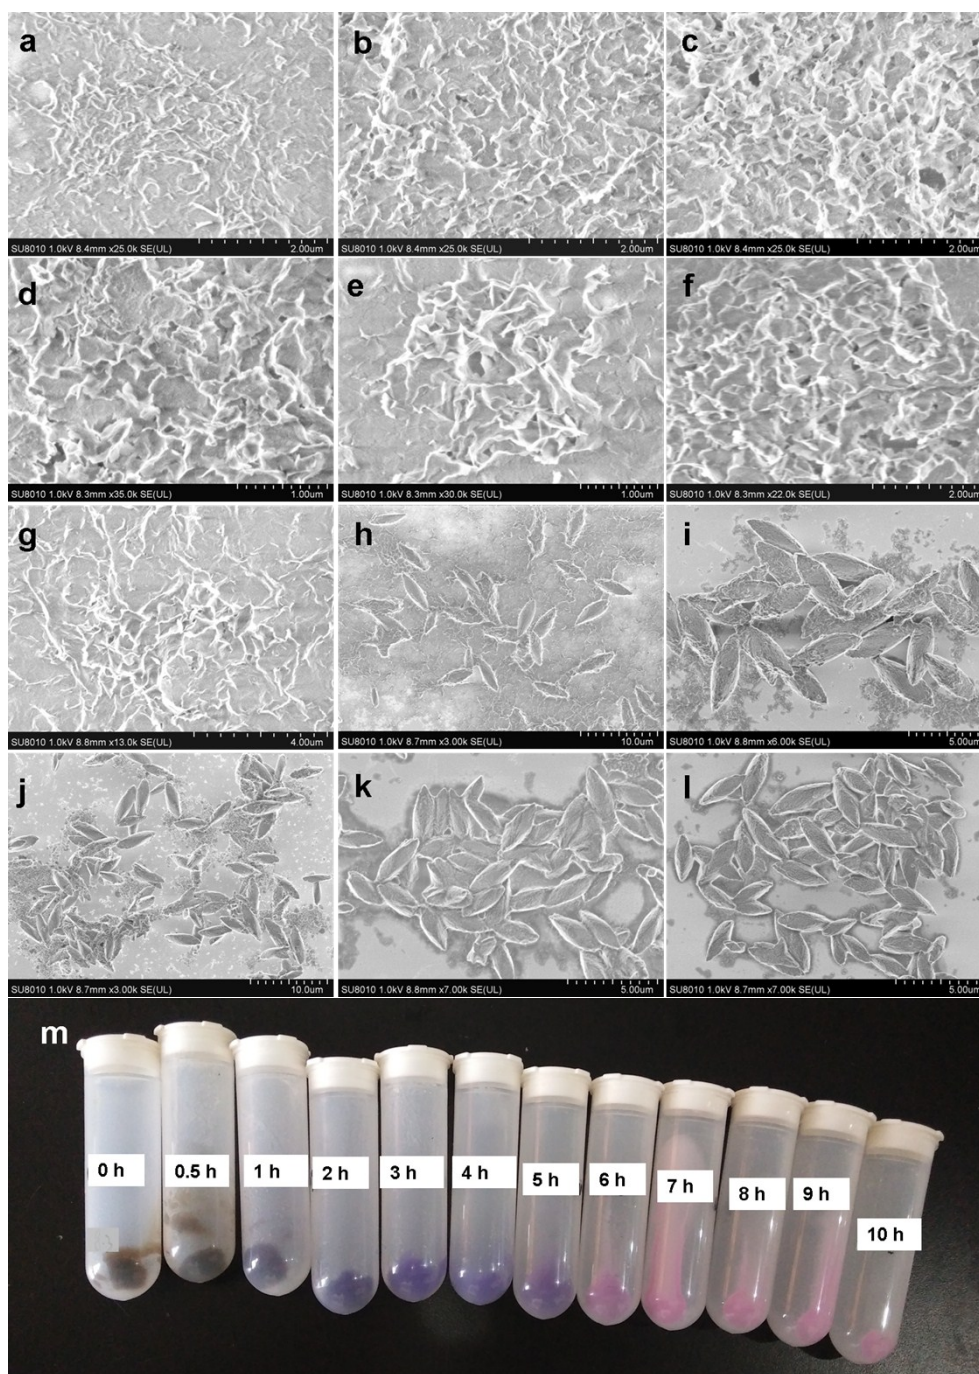

Fig.S6 SEM images of spindle-like ZnCo<sub>2</sub>O<sub>4</sub> precursors obtained at 180 °C with different reaction time: (a) 0 h, (b) 0.5 h, (c) 1 h, (d) 2 h, (e) 3 h, (f) 4 h, (g) 5 h, (h) 6 h, (i) 7 h, (j) 8 h, (k) 9 h, (l) 10 h, (m) the photographs of the above samples.

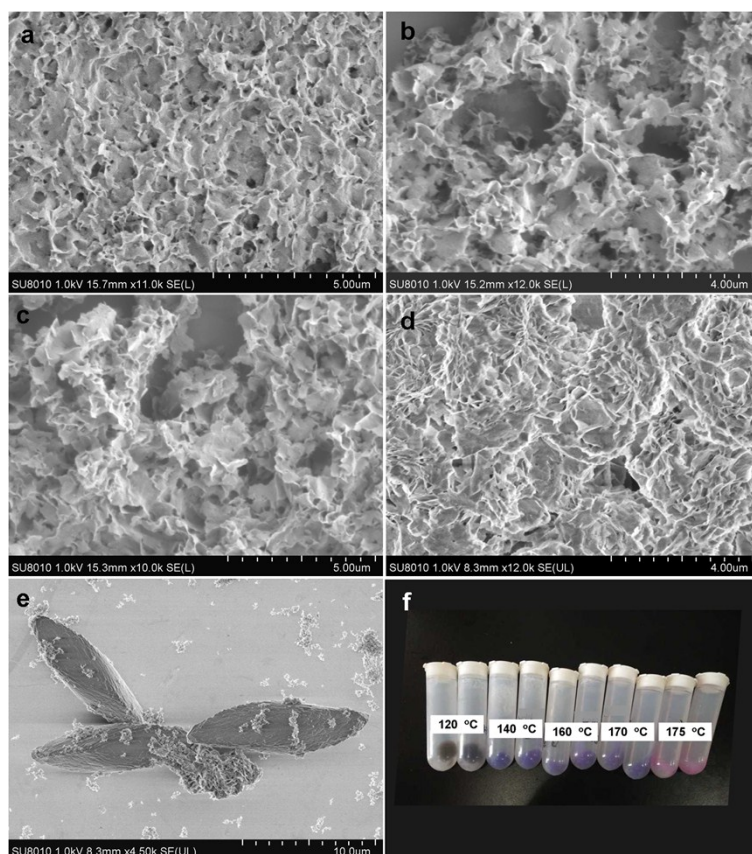

Fig.S7 SEM images of spindle-like  $\text{ZnCo}_2\text{O}_4$  precursors synthesized by keeping the reaction time of 12 h with different reaction temperatures: (a) 120 °C, (b) 140 °C, (c) 160 °C, (d) 170 °C, (e) 175 °C, (f) the photograph of the corresponding precursors in (a-e).

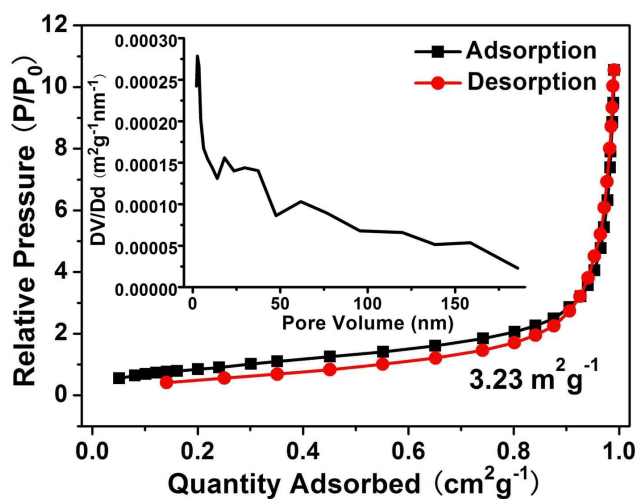

Fig.S8 The isotherm plot and the corresponding pore distribution curve of spindle-like  $\text{ZnCo}_2\text{O}_4$  precursors.

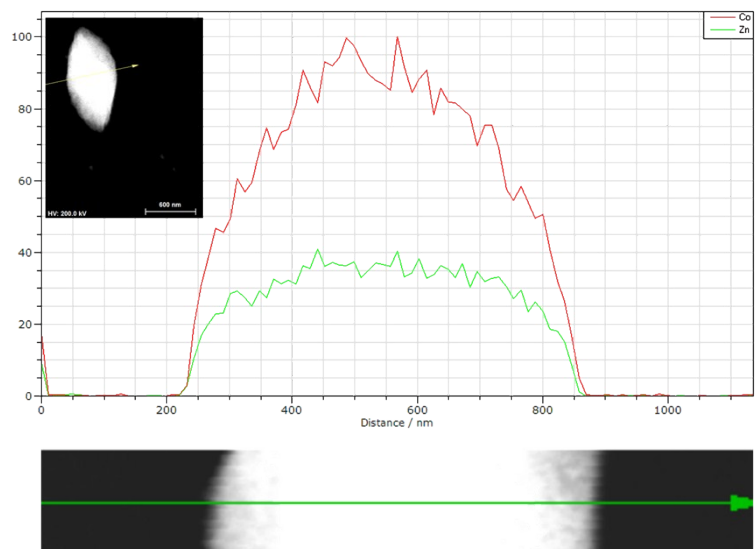

Fig.S9 Line scan and corresponding element distribution of a spindle-like  $\text{ZnCo}_2\text{O}_4$  precursor synthesized at  $180^\circ\text{C}$  for 12 h.

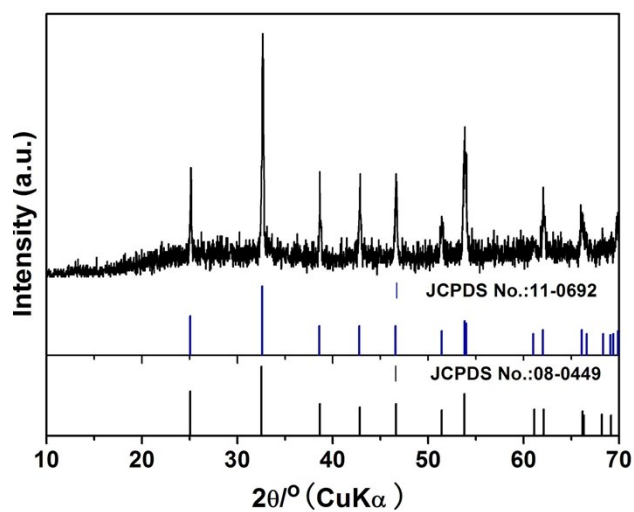

Fig.S10 The XRD pattern of truncated drum-like  $\text{ZnCo}_2\text{O}_4$  precursors obtained at  $180^\circ\text{C}$  for 12 h.



**Table 1 Comparison of OER activity in alkaline medium for different electrocatalytic materials**

| Catalysts                                                                                              | Electrolyt | Onset potential | Overpotential (mV)<br>@10 mAcm <sup>-2</sup> | Tafel slope<br>(mV/dec) | Ref. |
|--------------------------------------------------------------------------------------------------------|------------|-----------------|----------------------------------------------|-------------------------|------|
| NiCo <sub>2</sub> O <sub>4</sub> nanosheets/NF                                                         | 1 M KOH    |                 | 360                                          | 50-60                   | 66   |
| NiCo <sub>2</sub> O <sub>4</sub> /GC                                                                   | 1 M KOH    |                 | 400                                          | 50-60                   |      |
| Mn <sub>2.1</sub> Co <sub>0.9</sub> O <sub>4</sub>                                                     | 0.1 M KOH  |                 | 1.76 V vs. RHE (530)                         | 31                      | 67   |
| NiCo <sub>2</sub> O <sub>4</sub> nanowires                                                             | 1 M KOH    |                 | 460                                          | 90                      | 68   |
| La <sub>0.8</sub> Sr <sub>0.2</sub> Co <sub>0.2</sub> Fe <sub>0.8</sub> O <sub>3-δ</sub><br>(LSCF-10%) | 0.1 M KOH  | 1.583Vvs.RHE    | 1.643 V vs. RHE (413)                        | 81.59                   | 69   |
| CoxSy@C-1000                                                                                           | 0.1 M KOH  |                 | 470                                          |                         | 70   |
| ZnCo <sub>2</sub> O <sub>4</sub> truncated drum                                                        | 1 M KOH    |                 | 419                                          | 63.52                   | Our  |
| ZnCo <sub>2</sub> O <sub>4</sub> spindle                                                               | 1 M KOH    |                 | 389                                          | 57.32                   | work |

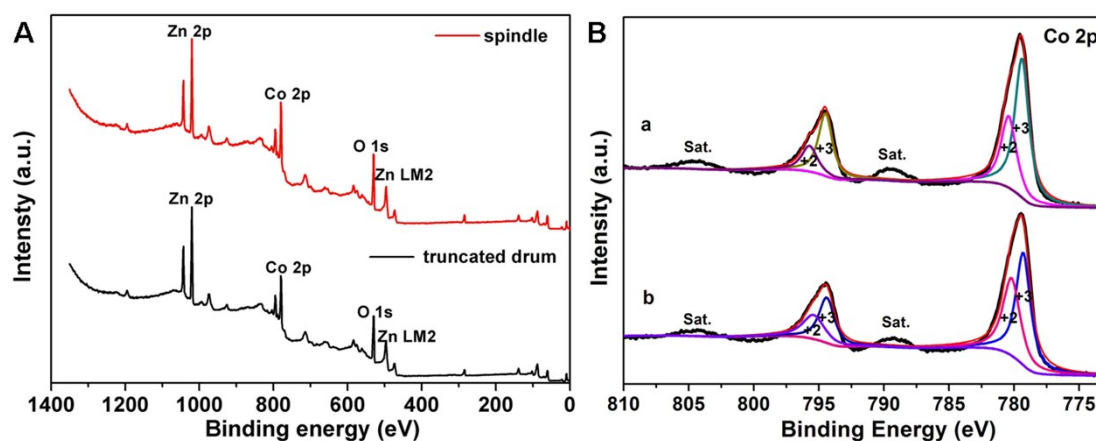

Fig.S11 (A) XPS spectra of ZnCo<sub>2</sub>O<sub>4</sub> with different morphologies, (B) Co 2p XPS spectra of (a) spindle-like samples. (b) truncated drum shaped samples.

**Table 2 Comparison of the ratios of Co<sup>3+</sup>/Co<sup>2+</sup> by integrating the XPS peaks of Co2p of ZnCo<sub>2</sub>O<sub>4</sub> micro-crystals with different morphologies.**

| Sample                                          | Areas of fitted peak                  |                                       |                                       |                                       |                                    |
|-------------------------------------------------|---------------------------------------|---------------------------------------|---------------------------------------|---------------------------------------|------------------------------------|
|                                                 | Co <sup>3+</sup> (2p <sub>3/2</sub> ) | Co <sup>2+</sup> (2p <sub>3/2</sub> ) | Co <sup>3+</sup> (2p <sub>1/2</sub> ) | Co <sup>2+</sup> (2p <sub>1/2</sub> ) | Co <sup>3+</sup> /Co <sup>2+</sup> |
| ZnCo <sub>2</sub> O <sub>4</sub> truncated drum | 116036.5                              | 97289.34                              | 49383.88                              | 37028.75                              | 1.23                               |
| ZnCo <sub>2</sub> O <sub>4</sub> porous spindle | 112678.6                              | 62529.64                              | 49666.42                              | 23274.31                              | 1.89                               |

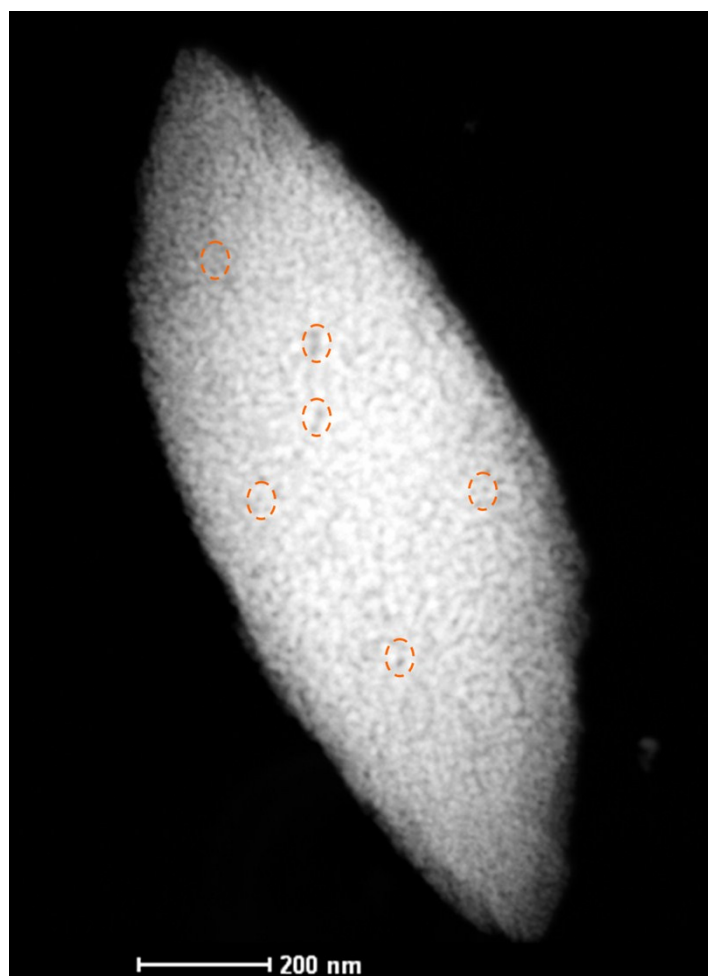

Fig.S12 The STEM image of an individual ZnCo<sub>2</sub>O<sub>4</sub> micro-spindle (inset cycles present mesopores obtained from the annealed ZnCo<sub>2</sub>O<sub>4</sub> precursor).

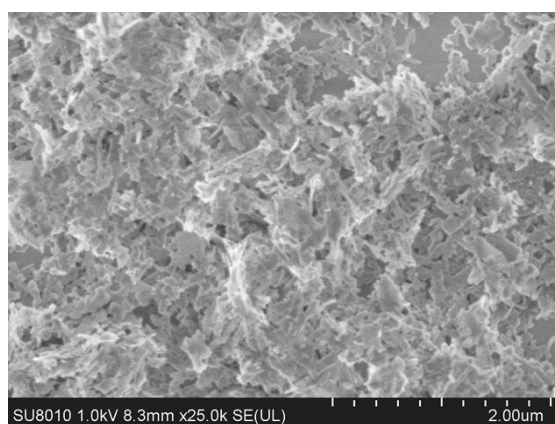

Fig.S13 SEM images of truncated drum shaped ZnCo<sub>2</sub>O<sub>4</sub> precursors obtained at 180 °C for 12 h with 0.3 mL of triethylamine.
